# Supplementary material for: The Impact of Hippocampal Sex Hormones Receptors in Modulation of Depressive-Like Behavior Following Chronic Anabolic Androgenic Steroids and Exercise Protocols in Rats
Source: Front Behav Neurosci. 2019 Feb 7;13:19. doi: 10.3389/fnbeh.2019.00019 (PMC6374347; doi:10.3389/fnbeh.2019.00019)
Supplement: TABLE S1 — The raw data for the parameters obtained in this study. [file Table_1.XLSX]

## Sheet: Sheet1
RAW DATA FOR THE PARAMETERS OBTAINED IN THIS STUDY
GROUPS	LATENCY TO THE FIRST IMMOBILITY	No OF IMMOBILITY EPISODES	TOTAL DURATION OF IMMOBILITY	AVERAGE DURATION OF IMMOBILITY EPISODE	TESTOSTERONE	DIHYDROTESTOSTERONE	ESTRADIOL	No of PV in CA1 (exp 1)	No of PV in CA1 (exp 2)	No of PV in CA1 (MEAN)	No of PV in CA2/3 (exp 1)	No of PV in CA2/3 (exp 2)	No of PV in CA2/3 (MEAN)	No of PV in DG (exp 1)	No of PV in DG (exp 2)	No of PV in DG (MEAN)	TOTAL No of PV (exp 1)	TOTAL No of PV (exp 2)	TOTAL No of PV (MEAN)	No of AR in CA1 (exp 1)	No of AR in CA1 (exp 2)	No of AR in CA1 (MEAN)	No of AR in CA2/3 (exp 1)	No of AR in CA2/3 (exp 2)	No of AR in CA2/3 (MEAN)	No of AR in DG (exp 1)	No of AR in DG (exp 2)	No of AR in DG (MEAN)	TOTAL No of AR (exp 1)	TOTAL No of AR (exp 2)	TOTAL No of AR (MEAN)	No of ERα in CA1 (exp 1)	No of ERα in CA1 (exp 2)	No of ERα in CA1 (MEAN)	No of ERα in CA2/3 (exp 1)	No of ERα in CA2/3 (exp 2)	No of ERα in CA2/3 (MEAN)	No of ERα in DG (exp 1)	No of ERα in DG (exp 2)	No of ERα in DG (MEAN)	TOTAL No of ERα (exp 1)	TOTAL No of ERα (exp 2)	TOTAL No of ERα (MEAN)	AR/ERα INDEX in CA1	AR/ERα INDEX in CA2/3	AR/ERα INDEX in DG	AR/ERα INDEX in TOTAL SECTION
CONTROL	65	13	140	10.77	1.58	650	15.56	43.6	39.12	41.36	12.08	13.82	12.95	13.98	16.44	15.21	105.02	92.7	98.86	46.57	51.67	49.12	36.58	31.56	34.07	114.51	128.93	121.72	375.4	304.96	340.18	134.93	111.39	123.16	83.73	105.15	94.44	395.83	331.41	363.62	1336.22	991.52	1163.87	39.89	36.08	33.48	29.23
	31	17	180	10.59	1.79	520	10.58	20.06	17.32	18.69	18.4	20.68	19.54	15.12	18.12	16.62	93.35	80.35	86.85	65.38	56.72	61.05	63.01	54.53	58.77	146.48	166.62	156.55	776.27	476.35	626.62	121.76	87.72	104.74	102.88	142.3	122.59	412.59	350.85	381.72	1405.31	1189.41	1297.36	58.29	47.94	41.01	48.3
	35	8	140	17.5	2.01	400	15.45	18.95	16.13	17.54	17.67	15.63	16.65	20.97	17.67	19.32	80.83	95.03	87.93	45.57	52.67	49.12	47.93	55.77	51.85	186.92	163.08	175	428.52	771	599.76	109.2	127.64	118.42	111.42	151.54	131.48	287.28	344.28	315.78	1169.5	1360.14	1264.82	41.48	39.44	55.42	47.42
	35	14	105	7.5	3.51	459	10.1	16.83	14.49	15.66	28.21	32.49	30.35	13.53	11.13	12.33	97.84	81.8	89.82	42.72	49.92	46.32	38.97	44.99	41.98	213.74	179.7	196.72	789.24	575.06	682.15	95.9	75.68	85.79	156.02	115.84	135.93	394.88	328.22	361.55	1223.87	1319.45	1271.66	53.99	30.88	54.41	53.64
	34	13	108	8.31	1.04	556	13.94	12.94	15.02	13.98	27.67	31.89	29.78	20.21	16.83	18.52	113.92	94.92	104.42	55.04	46.02	50.53	55.19	63.33	59.26	174.15	154.13	164.14	674.58	476.16	575.37	121.39	145.97	133.68	128.92	182.94	155.93	406.76	346.34	376.55	1090.82	1208.8	1149.81	37.8	38	43.59	50.04
	10	12	120	10	4.31	759	18.8	9.58	11.72	10.65	27.86	24.36	26.11	8.62	10.66	9.64	84.19	71.53	77.86	63.08	53.42	58.25	38.26	44.7	41.48	174.39	194.23	184.31	770.19	569.85	670.02	102.31	135.59	118.95	116.38	178.44	147.41	458.38	522.82	490.6	1252.25	1045.17	1148.71	48.97	28.14	37.57	58.33
	41	17	179	10.53	2.15	654	14	26.81	23.91	25.36	29.49	33.81	31.65	7.7	6.4	7.05	72.72	83.72	78.22	57.89	69.31	63.6	56.55	64.93	60.74	160.99	136.95	148.97	507.6	703.12	605.36	112.26	128.1	120.18	105.65	143.73	124.69	433.52	388.04	410.78	1015.77	1233.41	1124.59	52.92	48.71	36.26	53.83
	35	13	137	10.54	1.2	752	20.3	36.16	31.82	33.99	16.48	18.6	17.54	5.76	6.66	6.21	82.61	69.61	76.11	58.02	49.52	53.77	38.23	33.63	35.93	127.83	148.03	137.93	538.62	314.2	426.41	88.77	121.75	105.26	158.99	138.55	148.77	386.05	413.09	399.57	1006.93	1197.93	1102.43	51.08	24.15	34.52	38.68
EXERCISE	30	15	109	7.27	5.6	1258	20.5	33.81	37.49	35.65	26.3	30.34	28.32	23.31	27.41	25.36	133.33	114.73	124.03	37.45	32.03	34.74	32.22	28.02	30.12	71.65	81.79	76.72	412.63	256.83	334.73	160.1	124.12	142.11	136.37	220.43	178.4	556.73	647.75	602.24	1939.34	1634.1	1786.72	24.44	16.89	5.49	18.73
	39	11	83	7.55	3.45	850	15.6	46.29	50.43	48.36	23.69	20.29	21.99	19.4	23.2	21.3	161.64	139.44	150.54	16.51	14.37	15.44	21.55	23.39	22.47	42.14	48.54	45.34	131.96	166.54	149.25	132.81	162.97	147.89	120.74	176.8	148.77	556.99	603.69	580.34	2411.08	1788.08	2099.58	10.44	15.1	3.37	7.11
	8	10	57	5.7	4.7	1298	18.9	27.92	30.8	29.36	21.13	17.49	19.31	9.43	11.83	10.63	92.18	111.98	102.08	47	41.42	44.21	38.76	33.34	36.05	25.8	27.19	26.72	147.06	241.1	194.08	140.51	180.55	160.53	148.6	129.18	138.89	765.05	694.95	730	1905.42	1680.34	1792.88	27.54	25.96	1.58	10.83
	37	13	140	10.77	4.02	2010	25.3	18.86	16.52	17.69	14.07	12.23	13.15	14.46	17.46	15.96	83.22	99.62	91.42	31.57	37.21	34.39	38.52	34.08	36.3	28.35	30.97	29.66	163.43	203.41	183.42	129.71	148.19	138.95	148.2	122.18	135.19	626.46	568.72	597.59	1790.97	2132.07	1961.52	24.75	26.85	2.14	9.35
	25	9	135	15	8.45	650	22.2	41.69	37.35	39.52	34.06	38.96	36.51	23.19	19.23	21.21	148.94	126.54	137.74	33.98	39	36.49	26.64	24.22	25.43	51.33	47.29	49.31	186.67	242.51	214.59	191.6	149.46	170.53	218.59	134.42	176.54	660.7	691.2	675.95	1876.12	1698.38	1787.25	21.4	14.41	3.14	12.01
	11	14	77	5.5	6.39	896	19.68	26.8	24.08	25.44	30.38	25.38	27.88	19.51	16.47	17.99	136.02	117.02	126.52	22.09	25.63	23.86	23.13	25.27	24.2	43.72	39.38	41.55	147.35	192.57	169.96	132.23	167.77	150	194.83	134.79	164.81	795.05	739.95	767.5	1791.16	2037.8	1914.48	15.91	14.68	2.33	8.88
	25	12	87	7.25	8.55	1980	18.45	17.28	19.82	18.55	31.91	28.11	30.01	22.99	27.03	25.01	107.03	129.23	118.13	23.17	20.33	21.75	20.74	18.76	19.75	52.54	59.18	55.86	246.08	170.04	208.06	138.47	196.61	167.54	137.04	203.7	170.37	662.72	691.6	677.16	1630.6	1829.62	1730.11	12.98	11.59	3.56	12.03
	33	10	67	6.7	7.56	1112	10.5	31.01	34.09	32.55	19.87	17.23	18.55	22.16	26.14	24.15	116.13	136.79	126.46	33.26	39.02	36.14	32.45	37.93	35.19	58.2	52.14	55.17	249.93	295.91	272.92	123.91	162.05	142.98	151.72	119.88	135.8	677.76	718.8	698.28	1862.6	1659.5	1761.05	25.28	25.91	3.41	15.5
NANDROLONE-DECANOATE	40	13	156	12	8.24	654	11.33	8.13	9.87	9	8.5	9.5	9	3.77	4.75	4.26	41.24	35	38.12	63.96	76.4	70.18	77.79	67.89	72.84	203.98	179.64	191.81	668.56	367.92	518.24	99.18	86.78	92.98	137.8	116.52	127.16	472.02	450.92	461.47	1093.66	1501.06	1297.36	75.47	57.28	41.57	39.95
	84	12	182	15.17	10.66	598	17.84	8.28	10.3	9.29	10.61	8.07	9.34	7.75	6.49	7.12	50.21	43.21	46.71	81.01	69.17	75.09	86.4	76.56	81.48	195.3	184.88	190.09	439.5	639.64	539.57	120.47	142.69	131.58	148.46	133.02	140.74	421.9	441.04	431.47	1147.37	1531.51	1339.44	57.07	57.89	44.06	40.28
	42	11	189	17.18	9.34	841	26.03	11.72	10.28	11	8.84	11.08	9.96	5.98	7.18	6.58	40.96	48.16	44.56	112.02	93.6	102.81	67.72	59.68	63.7	365.81	311.77	338.79	1620.69	978.25	1299.47	96.44	110.58	103.51	122.58	104.58	113.58	514.3	457.26	485.78	1169.39	1341.09	1255.24	99.32	56.09	69.74	103.52
	24	13	231	17.77	4.25	1236	24.96	18.3	16.02	17.16	9.95	12.77	11.36	8.25	7.25	7.75	46.65	55.05	50.85	90.82	77.6	84.21	70.97	64.83	67.9	286.8	312.34	299.57	1474.8	830.66	1152.73	92.08	116.7	104.39	110.78	123.78	117.28	393.18	373.7	383.62	1334.49	1134.29	1234.39	80.67	57.89	78.09	93.38
	32	9	168	18.67	5.77	1402	30.55	13.86	12.36	13.11	10.6	13.26	11.93	6.34	5.22	5.78	47.35	40.75	44.05	76.92	66.94	71.93	80.41	90.95	85.68	290.11	308.17	299.14	849.51	1445.35	1147.43	92.16	102.58	97.37	146.96	127.12	137.04	449.56	479.58	464.57	1482.89	1216.19	1345.04	73.87	62.52	64.39	85.31
	53	13	133	10.23	7.84	421	33.41	21.12	18.88	20	11.61	14.49	13.05	10.94	9.14	10.04	51.33	59.53	55.43	100.7	84.56	92.63	64.08	72.22	68.15	349.35	335.13	342.24	1165.34	1620.88	1393.11	112.01	77.47	94.74	153.35	129.37	141.36	322.01	343.85	332.93	1323.08	982.24	1152.66	97.78	48.21	102.8	120.86
	35	12	158	13.17	9.14	1380	14.84	15.47	17.75	16.61	17.38	13.98	15.68	7.03	7.81	7.42	47.04	54.84	50.94	108.46	91.9	100.18	78.9	89	83.95	273.38	318	295.69	1021.89	1275.93	1148.91	95.84	133.98	114.91	168.39	124.21	146.3	475.76	511.3	493.53	1232.86	1101.02	1166.94	87.18	57.38	59.91	98.45
	58	10	177	17.7	8.65	527	20.1	14.54	15.92	15.23	8.83	10.43	9.63	6.27	7.67	6.97	47.82	55.62	51.72	71.55	82.49	77.02	70.27	64.29	67.28	181.62	161.48	171.55	581.55	397.21	489.38	80.82	92.86	86.84	141.15	90.95	116.05	359.32	332.92	346.12	1191.44	1336.08	1263.76	88.69	57.98	49.56	38.72
EXERCISE+NANDROLONE-DECANOATE	20	12	141	11.75	14.14	1117	18.46	35.82	39.74	37.78	20.57	22.63	21.6	14.67	17.13	15.9	117.82	100.22	109.02	69.37	79.41	74.39	53.02	59.08	56.05	191.21	215.69	203.45	772.39	618.25	695.32	108.91	80.57	94.74	96.1	136.5	116.3	494.35	452.71	473.53	1335.98	1520.22	1428	78.52	48.2	42.96	48.69
	43	11	115	10.45	11.22	856	29.33	32.64	35.76	34.2	16.32	19.32	17.82	15.28	17.76	16.52	88.62	104.02	96.32	63.99	73.55	68.77	60.52	69.36	64.94	164.36	186.5	175.43	528.99	631.42	580.21	90.28	134.28	112.28	149.93	134.51	142.22	369.44	396.08	382.76	1555.17	1352.77	1453.97	61.25	45.66	45.83	39.91
	46	9	195	21.67	4.96	924	16.04	21.46	23.74	22.6	19.94	23.26	21.6	6.83	8.43	7.63	78.95	92.97	85.96	48.47	56.09	52.28	77.08	71.06	74.07	230.33	264.49	247.41	1016.69	857.21	936.95	144.13	119.03	131.58	139.93	123.77	131.85	507	525.42	516.21	1461.15	1246.81	1353.98	39.73	56.18	47.93	69.2
	31	9	137	15.22	9.74	477	35.96	24.75	21.93	23.34	19.75	16.27	18.01	13.54	11.52	12.53	78.2	91.4	84.8	70.67	61.25	65.96	66.55	74.69	70.62	239.34	278.76	259.05	1091.66	895.82	993.74	85.37	123.41	104.39	128.58	166.98	147.78	575.82	531.6	553.71	1482.48	1237.48	1359.98	63.19	47.79	46.78	73.07
	46	17	125	7.35	10.3	1008	22.63	15.77	14.13	14.95	14.05	16.23	15.14	11.31	13.29	12.3	84.76	72.16	78.46	75.92	67.94	71.93	57.53	53.09	55.31	174.44	160.04	167.24	461.61	516.05	488.83	128.01	117.61	122.81	126.8	110.24	118.52	454.19	424.61	439.4	1493.97	1302.83	1398.4	58.57	46.67	38.06	34.96
	37	11	90	8.18	15.12	422	17.41	17.03	15.11	16.07	16.45	20.21	18.33	19.85	22.95	21.4	94.39	81.29	87.84	54.32	60.76	57.54	60.6	64.84	62.72	221.11	195.27	208.19	626.71	810.75	718.73	121.15	149.55	140.35	142.23	119.99	131.11	500.24	459.25	479.74	1250.9	1384.22	1317.56	41	47.83	43.4	54.55
	42	9	148	16.44	5.98	1320	13.98	26.9	23.12	25.01	17.6	20.88	19.24	13.31	15.97	14.64	86.44	102.2	94.32	52.54	58.52	55.53	69.21	75.23	72.22	228.52	208.54	218.53	712.4	868.26	790.42	68.8	131.2	100	124.3	110.26	117.28	373.04	406.28	389.66	1303.64	1505.14	1404.39	55.53	61.58	56.08	56.28
	26	12	141	11.75	5.2	1110	31.14	27.34	29.76	28.55	19.4	22.72	21.06	17.36	14.2	15.78	91.79	111.59	101.69	70.54	80.68	75.61	52.79	58.33	55.56	226.37	265.01	245.69	1004.98	804.54	904.76	137.45	113.43	125.44	129.83	173.87	151.85	432.67	477.67	455.17	1527.7	1301.8	1414.75	60.28	36.59	53.98	63.95
TESTOSTERONE-ENANTHATE	60	9	255	28.33	28.21	1118	25.2	6.43	7.41	6.92	10.21	8.41	9.31	8.46	10.22	9.34	42.89	50.13	46.51	122.05	103.91	112.98	87.54	77.4	82.47	178.86	221.14	200	566.69	761.61	664.15	115.02	97.26	106.14	156.35	121.43	138.89	526.2	478.12	502.16	1259.64	1395.14	1327.39	106.45	59.38	39.83	50.03
	33	9	194	21.56	30.45	2429	24.8	11.07	12.61	11.84	12.22	10.16	11.19	7.16	8.46	7.81	45.9	52.56	49.23	75.1	65.26	70.18	53.31	48.91	51.11	298	257.86	277.93	855.61	1053.59	954.6	81.81	86.61	84.21	110.55	128.95	119.75	333.46	360.5	346.98	1371.17	1029.13	1200.15	83.33	42.68	80.1	79.54
	45	5	221	44.2	34.51	2622	28.5	13.42	14.6	14.01	12.7	11.3	12	7.58	8.7	8.14	57.62	49	53.31	74.41	66.65	70.53	75.99	82.03	79.01	249.05	209.57	229.31	677.94	837.98	757.96	90.26	106.24	98.25	108.05	88.25	98.15	440.2	419.98	430	1481.71	1310.01	1395.86	71.79	80.5	53.33	54.3
	52	10	175	17.5	12.3	2484	35.8	14.05	12.01	13.03	17.09	14.09	15.59	8.46	7.2	7.83	54.89	46.97	50.93	79.04	92.88	85.96	79.32	71.3	75.31	282.6	242.92	262.76	849.82	1033.82	941.82	72.83	106.11	89.47	96.78	137.78	117.28	423.95	459.85	441.9	1491.86	1307.66	1399.76	96.08	64.21	59.46	67.28
	102	9	150	16.67	35.58	2056	10.5	9.65	12.07	10.86	12.57	10.37	11.47	7.71	6.51	7.11	39.7	47.66	43.68	104.55	90.53	97.54	74.84	66.4	70.62	199.28	238.3	218.79	807.39	608.95	708.17	96.59	124.47	110.53	123.47	167.89	145.68	414.05	373.01	393.53	1213.31	1069.87	1141.59	88.25	48.47	55.6	62.03
	59	13	175	13.46	25.98	2896	32.3	11.58	9.78	10.68	11.52	9.72	10.62	6.84	5.94	6.39	35.02	40.82	37.92	79.31	69.47	74.39	79.59	69.55	74.57	252.48	212.34	232.41	885.41	682.99	784.2	100.02	128.06	114.04	120.59	180.65	150.62	318.99	346.53	332.76	1195.62	1409.16	1317.39	65.23	49.51	69.84	59.53
	60	15	170	11.33	20.45	3045	26.7	10.84	9.34	10.09	8.24	9.14	8.69	8.17	6.57	7.37	38.74	46.12	42.43	73.64	85.98	79.91	59.09	53.25	56.17	267.21	292.79	280	771.58	1114	942.79	116.39	78.35	97.37	94.07	112.11	103.09	378.82	416.86	397.84	1258.19	1222.29	1190.24	82.07	54.49	70.38	79.21
	54	8	177	22.13	9.36	3250	24.5	6.61	7.73	7.17	16.44	14.04	15.24	6.68	5.8	6.24	40	47.08	43.54	96.35	111.89	104.12	84.03	97.45	90.74	275.39	310.81	293.1	1116.91	1351.05	1233.98	103.45	122.87	113.16	133.29	179.05	156.17	352.05	334.15	343.1	935.59	1278.49	1107.04	92.02	58.1	85.43	111.47
EXERCISE+TESTOSTERONE-ENANTHATE	43	15	171	11.4	38.64	2478	35.2	10.39	11.81	11.1	11.05	12.75	11.9	5.52	6.18	5.85	49.95	41.93	45.94	50.32	57.76	54.04	71.77	81.81	76.79	274.03	235.63	254.83	851.69	1006.11	928.9	129.51	154.71	142.11	124.41	152.63	138.52	486.04	540.68	513.36	1425.35	1741.05	1583.2	38.02	55.44	49.64	58.67
	40	11	138	12.55	24.64	2778	18.9	12.38	10.66	11.52	10.23	9.03	9.63	7.56	8.96	8.26	43.93	51.49	47.71	65.2	57.6	61.4	64.91	57.07	60.99	234.5	209.98	222.24	825.18	718.94	758.56	79.5	59.1	69.3	220.27	170.85	195.56	459.61	504.53	482.07	1496.1	1740.54	1618.32	88.61	31.19	46.1	46.87
	52	11	126	11.45	25.55	2594	25.68	6.25	4.85	5.55	12.47	10.37	11.37	6.61	7.43	7.02	42.74	49.84	46.29	56.3	48.26	52.28	63.02	58.96	60.99	245.36	209.83	227.59	766.37	722.15	744.26	108.66	158	133.33	88.4	74.56	81.48	575.31	521.25	548.28	1367.12	1151.7	1259.41	39.21	74.85	41.51	59.1
	47	9	110	12.22	42.07	2094	40.3	16.28	18.5	17.39	8.69	10.65	9.67	8.71	7.39	8.05	45.59	52.61	49.1	78.05	67.91	72.98	66.93	70.35	68.64	321.51	279.17	300.34	1009.76	1265.74	1137.75	133.94	104.66	119.3	138.52	150.36	144.44	529.82	494.32	512.07	1434.92	1635.14	1535.12	61.18	47.52	58.65	74.11
	72	12	115	9.58	35.6	2987	25.3	10.8	13	11.9	13.62	16.08	14.85	12.44	10.4	11.42	53.09	61.49	57.29	44.04	50.7	47.37	77.27	83.71	80.49	228.97	206.55	217.76	574.14	759.9	667.02	118.58	158.62	138.6	139.09	213.51	176.3	527.24	505.7	516.47	1483.57	1677.61	1580.59	34.18	45.66	42.16	42.2
	32	9	168	18.67	45.52	3220	35.6	7.43	5.93	6.68	7.42	8.42	7.92	8.04	6.72	7.38	41.89	35.91	38.9	48.83	56.43	52.63	58.18	64.78	61.48	242.26	260.5	251.38	1000.9	857.06	928.98	120.54	97	108.77	107.98	89.8	98.89	406.33	450.73	428.53	1497.52	1326.48	1412	48.39	62.17	58.66	65.79
	53	10	170	17	33.65	1050	14.5	10.26	12.18	11.22	11.43	13.47	12.45	5.52	6.4	5.96	44.14	53.68	48.91	91.06	106.48	98.77	73.62	79.46	76.54	180.94	162.86	171.9	539.86	643.9	591.88	152.6	114.06	133.33	95.17	124.59	109.88	484.06	548.7	516.38	1542.72	1341.18	1441.95	74.08	69.66	33.29	41.05
	67	10	148	14.8	28.9	4120	12.4	13.4	15.8	14.6	11.92	14.52	13.22	5.19	6.19	5.69	48.16	56.38	52.27	76.03	86.07	81.05	84.51	78.45	81.48	235.28	210.4	222.84	829.39	983.43	906.41	101.53	119.53	110.53	199.07	158.95	179.01	438.18	397.16	417.67	1316.2	1828.9	1572.55	73.33	45.52	53.35	57.64
