# Supplementary material for: The Impact of Hippocampal Sex Hormones Receptors in Modulation of Depressive-Like Behavior Following Chronic Anabolic Androgenic Steroids and Exercise Protocols in Rats
Source: Front Behav Neurosci. 2019 Feb 7;13:19. doi: 10.3389/fnbeh.2019.00019 (PMC6374347; doi:10.3389/fnbeh.2019.00019)
Supplement: TABLE S2 — Two-way ANOVA of independent and joint effects of estimated variables for parameters obtained in this study. [file Table_2.XLSX]

## Sheet: Two way ANOVA
TWO-WAY ANOVA ANALYSIS OF INDEPENDENT AND JOINT EFFECTS OF ESTIMATED VARIABLES FOR PARAMETERS OBTAINED IN THIS STUDY
Two-way ANOVA analysis of independent and joint effects of estimated variables for parameters obtained in behavioral testing
Table A	Parameter	Treatment (factor)	F	Sig.	Partial eta squared (η2)
Tail suspension test	TDI	Exercise	(1, 42)=25,142	p=0,000	0.374
		AASs	(2, 42)=12,594	p=0,000	0.375
		Exercise*AASs interaction	(2, 42)=0,092	p=0,912	0.004
	Average duration of an immobility episode	Exercise	(1, 42)=8,326	p=0,006	0.165
		AASs	(2, 42)=9,353	p=0,000	0.312
		Exercise*AASs interaction	(2, 42)=1,688	p=0,197	0.074
Two-way ANOVA analysis of independent and joint effects of estimated variables for sex hormones serum levels
Table B	Parameter	Treatment (factor)	F	Sig.	Partial eta squared (η2)
Hormones	Testosterone	Exercise	(1, 42)=10,362	p=0,002	0.198
		AASs	(2, 42)=97,738	p=0,000	0.823
		Exercise*AASs interaction	(2, 42)=2,356	p=0,107	0.101
	DHT	Exercise	(1, 42)=3,370	p=0,073	0.074
		AASs	(2, 42)=50,368	p=0,000	0.706
		Exercise*AASs interaction	(2, 42)=1,520	p=0,231	0.067
Two-way ANOVA analysis of independent and joint effects of estimated variables for parameters obtained in IHC
Table C	Parameter	Treatment (factor)	F	Sig.	Partial eta squared (η2)
Immunohistochemistry in hippocampus	No of AR in CA1	Exercise	(1, 42)=34,196	p=0,000	0.449
		AASs	(2, 42)=36,336	p=0,000	0.634
		Exercise*AASs interaction	(2, 42)=0,111	p=0,895	0.005
	No of AR in CA2/3	Exercise	(1, 42)=13,794	p=0,001	0.247
		AASs	(2, 42)=59,623	p=0,000	0.74
		Exercise*AASs interaction	(2, 42)=3,431	p=0,042	0.14
	No of AR in DG	Exercise	(1, 42)=27,332	p=0,000	0.394
		AASs	(2, 42)=63,864	p=0,000	0.753
		Exercise*AASs interaction	(2, 42)=6,218	p=0,004	0.228
	No of AR in total hippocampal section	Exercise	(1, 42)=10,723	p=0,002	0.203
		AASs	(2, 42)=27,076	p=0,000	0.563
		Exercise*AASs interaction	(2, 42)=2,228	p=0,120	0.096
	No of ERα in CA1	Exercise	(1, 42)=25,614	p=0,000	0.379
		AASs	(2, 42)=11,131	p=0,000	0.346
		Exercise*AASs interaction	(2, 42)=2,953	p=0,063	0.123
	No of ERα in DG	Exercise	(1, 42)=66,784	p=0,000	0.614
		AASs	(2, 42)=10,961	p=0,000	0.343
		Exercise*AASs interaction	(2, 42)=19,288	p=0,000	0.479
	No of ERα in total hippocampal section	Exercise	(1, 42)=152,531	p=0,000	0.784
		AASs	(2, 42)=17,704	p=0,000	0.457
		Exercise*AASs interaction	(2, 42)=33,257	p=0,000	0.613
	AR-ERα index in CA1	Exercise	(1, 42)=51,817	p=0,000	0.552
		AASs	(2, 42)=41,502	p=0,000	0.664
		Exercise*AASs interaction	(2, 42)=0,068	p=0,934	0.003
	AR-ERα index in CA2/3	Exercise	(1, 42)=12,682	p=0,001	0.232
		AASs	(2, 42)=42,436	p=0,000	0.669
		Exercise*AASs interaction	(2, 42)=2,486	p=0.095	0.106
	AR-ERα index in DG	Exercise	(1, 42)=50,471	p=0,000	0.546
		AASs	(2, 42)=42,606	p=0,000	0.67
		Exercise*AASs interaction	(2, 42)=4,828	p=0.013	0.187
	AR-ERα index in total hippocampal section	Exercise	(1, 42)=22,418	p=0,000	0.348
		AASs	(2, 42)=20,907	p=0,000	0.499
		Exercise*AASs interaction	(2, 42)=1,412	p=0,255	0.063
	No of PV neurons in CA1	Exercise	(1, 42)=10,689	p=0,002	0.203
		AASs	(2, 42)=18,156	p=0,000	0.464
		Exercise*AASs interaction	(2, 42)=2,311	p=0,112	0.099
	No of PV neurons in CA2/3	Exercise	(1, 42)=4,801	p=0,034	0.103
		AASs	(2, 42)=28,804	p=0,000	0.578
		Exercise*AASs interaction	(2, 42)=3,450	p=0,041	0.141
	No of PV neurons in DG	Exercise	(1, 42)=22,738	p=0,000	0.351
		AASs	(2, 42)=27,548	p=0,000	0.567
		Exercise*AASs interaction	(2, 42)=5,882	p=0,006	0.219
	No of PV neurons in total hippocampal section	Exercise	(1, 42)=83,239	p=0,000	0.665
		AASs	(2, 42)=126,972	p=0,000	0.858
		Exercise*AASs interaction	(2, 42)=18,275	p=0,000	0.465
